# Supplementary material for: High Maternal Serum Estradiol Levels Induce Dyslipidemia in Human Newborns via a Hepatic HMGCR Estrogen Response Element
Source: PubMed Central journal article supplement (PMC4426719; doi:10.1038/srep10086), 2015-05-11
Supplement: srep10086-s1.pdf [file srep10086-s1.pdf]

## **Supplemental Materials**

**Title:** High Maternal Serum Estradiol Levels Induce Dyslipidemia in Human Newborns via a Hepatic HMGCR Estrogen Response Element

**Authors:** Ye Meng, Ping-Ping Lv, Guo-Lian Ding, Tian-Tian Yu, Ye Liu, Yan Shen, Xiao-Ling Hu, Xian-Hua Lin, Shen Tian, Min Lv, Yang Song, Meng-Xi Guo, Zhang-Hong Ke, Hong Xu, Jian-Zhong Sheng, Feng-Tao Shi, He-Feng Huang

### **Contents:**

Number of supplemental tables: 1.

Number of supplemental figures: 2.

**Table S1 Nucleotide sequences of primers used for quantitative Real-time PCR and PCR**

| Gene Name          | Accession Number | Sequences (5'->3') |                          | Length |
|--------------------|------------------|--------------------|--------------------------|--------|
| Human HMGCR        | NM_000859.2      | Forward            | TGAGGGCTCCTTCCGCTCCG     | 78bp   |
|                    |                  | Reverse            | ACTAGAGGCCACCGAACCCCG    |        |
| Human CYP7A1       | NM_000780.3      | Forward            | TCTTACAAGGCGGGACACAC     | 166bp  |
|                    |                  | Reverse            | GTTCTCGTGCCTCAAGCTCT     |        |
| Human LCAT         | NM_000229.1      | Forward            | CCCATGGCAGTGGGTGACG      | 148bp  |
|                    |                  | Reverse            | CAGCCGGGCACGAGGATGAC     |        |
| Human LPL          | NM_000237.2      | Forward            | GTGGACTGGCTGTCACGGGC     | 168bp  |
|                    |                  | Reverse            | GCCAGCAGCATGGGCTCCAA     |        |
| Human GAPDH        | NM_002046.5      | Forward            | CAGGGCTGCTTTTAACTCTGG    | 102bp  |
|                    |                  | Reverse            | TGGGTGGAATCATATTGGAACA   |        |
| Mouse Hmgcr        | NM_008255.2      | Forward            | CCACGCAGCAAACATTGTCA     | 199bp  |
|                    |                  | Reverse            | GCAGGCTTGCTGAGGTAGAA     |        |
| Mouse Gapdh        | NM_001289726.1   | Forward            | TGACGTGCCGCCTGGAGAAA     | 98bp   |
|                    |                  | Reverse            | AGTGTAGCCCAAGATGCCCTTCAG |        |
| Human HMGCR (ChIP) | NC_000005.10     | Forward            | ACGGAGCCTTAGCTGCCTTC     | 174bp  |
|                    |                  | Reverse            | GCTCACACTCCTCAGCCCTT     |        |

Abbreviations: HMGCR: 3-hydroxy-3-methylglutaryl-CoA reductase; CYP7A1: cholesterol 7 $\alpha$ -hydroxylase; LCAT: lecithin-cholesterol acyltransferase; LPL: lipoprotein lipase, GAPDH: glyceraldehyde-3-phosphate dehydrogenase.

**Figure S1**

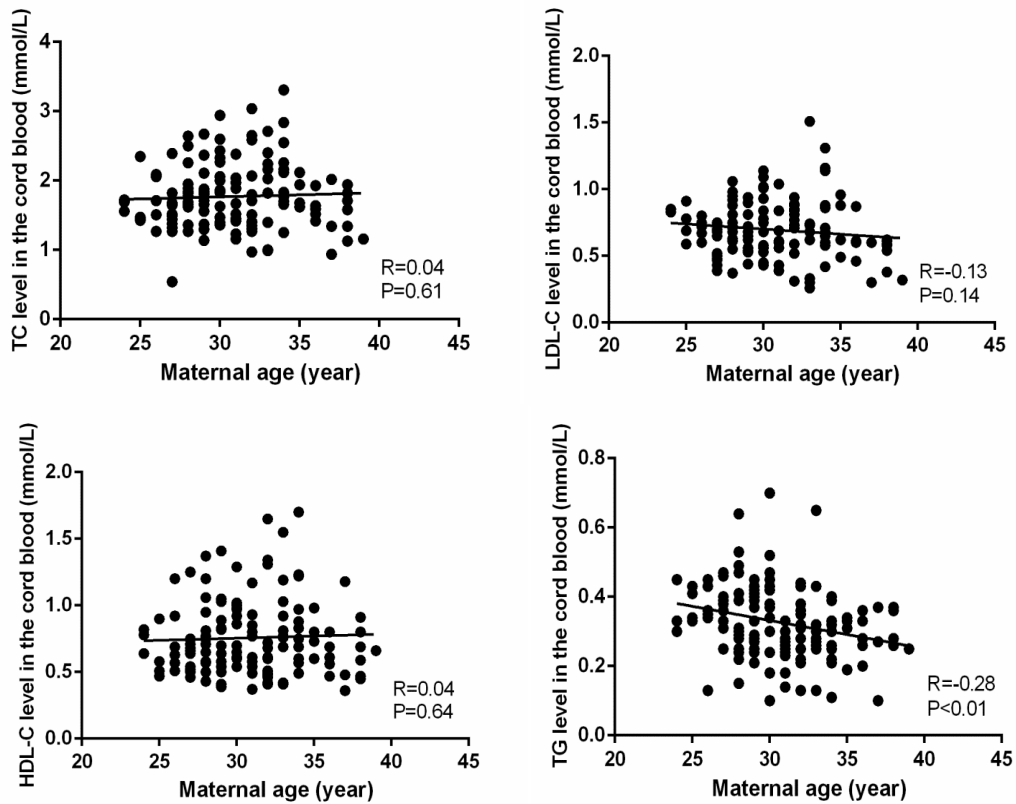

**Figure S1. The correlation between lipid levels and the maternal age in the umbilical cord blood of newborns.**

The amounts of TC, LDL-C, HDL-C and TG had no correlation with the maternal age in the 44 newborns ( $R = 0.04$ ,  $P = 0.61$ ;  $R = -0.13$ ,  $P = 0.14$ ;  $R = 0.04$ ,  $P = 0.64$ ;  $R = -0.28$ ,  $P < 0.01$ ; respectively). TC: total cholesterol; LDL-C: low-density lipoprotein cholesterol; HDL-C: high-density lipoprotein cholesterol; TG: triglyceride.

**Figure S2**

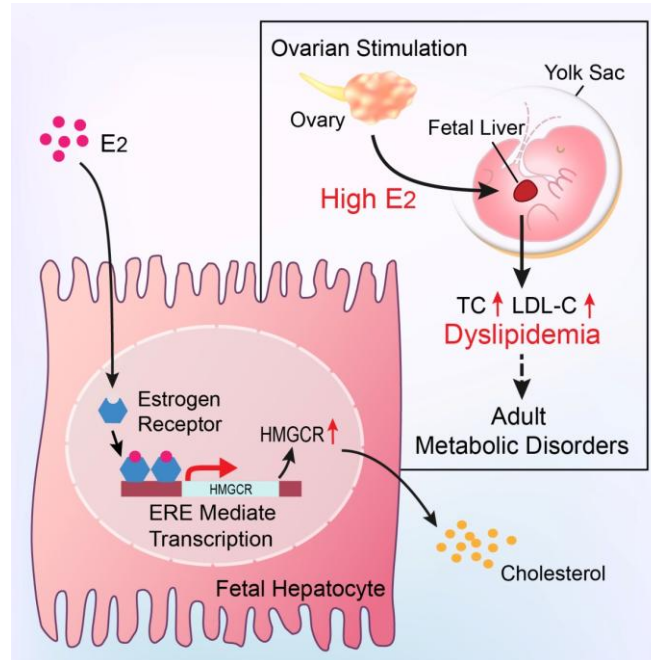

**Figure S2. Hypothetical schematic representation of dyslipidemia induced by high E<sub>2</sub> in human newborns.**

OS at IVF-ET procedure can induce maternal high E<sub>2</sub> throughout pregnancy. Intrauterine high E<sub>2</sub> can up-regulate the cholesterol synthesis rate-limiting enzyme HMGCR expression in fetal hepatocytes via an ERE in the promoter and induces elevated levels of TC and LDL-C levels in offspring that may be related to increased risk of metabolic diseases in adulthood. OS: ovarian stimulation; E<sub>2</sub>: estradiol; IVF-ET: *in vitro* fertilization and embryo transfer; HMGCR: 3-hydroxy-3-methylglutaryl-CoA reductase; ERE: estrogen response element; TC: total cholesterol; LDL-C: low-density lipoprotein cholesterol.
